# Supplementary material for: Rational design of a cyclohexanone dehydrogenase for enhanced α,β-desaturation and substrate specificity
Source: Royal Society of Chemistry journal article supplement (doi:10.1039/d3sc04009g), 2024-01-01
Supplement: d3sc04009g3.pdf [file d3sc04009g3.pdf]

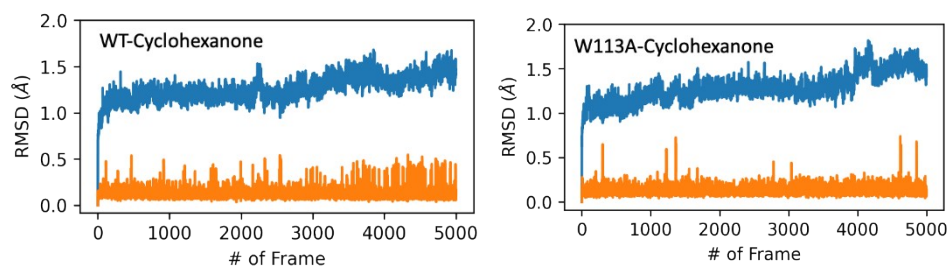

**Figure S10.** The RMSD obtained from wild type CDH and W113A in complex with cyclohexanone ligand for 500 ns trajectory. The RMSD values of C $\alpha$  atoms of the protein and the heavy atoms of cyclohexanone ligand are shown in blue and orange colours respectively.
