# Supplementary material for: Rational design of a cyclohexanone dehydrogenase for enhanced α,β-desaturation and substrate specificity
Source: Royal Society of Chemistry journal article supplement (doi:10.1039/d3sc04009g), 2024-01-01
Supplement: d3sc04009g4.pdf [file d3sc04009g4.pdf]

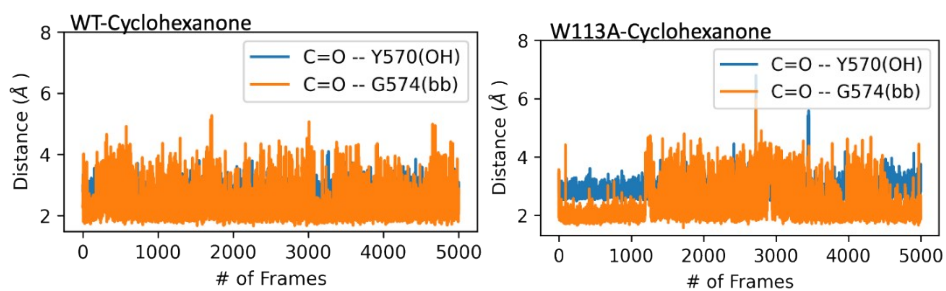

**Figure S11.** The hydrogen bonding in the wild type CDH and W113A in complex with cyclohexanone. The interatomic distance between the carbonyl oxygen of the cyclohexanone and the side chain of Y570 and the backbone of G574 residue for the 500 ns trajectory.
