# Supplementary material for: Rational design of a cyclohexanone dehydrogenase for enhanced α,β-desaturation and substrate specificity
Source: Royal Society of Chemistry journal article supplement (doi:10.1039/d3sc04009g), 2024-01-01
Supplement: d3sc04009g5.pdf [file d3sc04009g5.pdf]

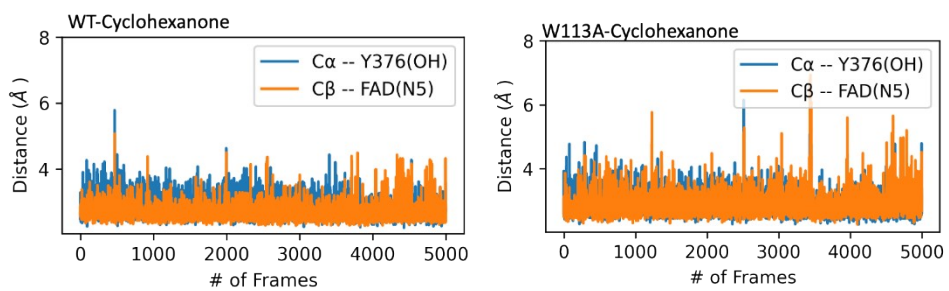

**Figure S12.** The interatomic distance of the axial proton located at the C $\alpha$  and C $\beta$  position of cyclohexanone in WT and W113A for the 500 ns trajectory.
