# Supplementary material for: Rational design of a cyclohexanone dehydrogenase for enhanced α,β-desaturation and substrate specificity
Source: Royal Society of Chemistry journal article supplement (doi:10.1039/d3sc04009g), 2024-01-01
Supplement: d3sc04009g6.pdf [file d3sc04009g6.pdf]

A

3-methylcyclohexanone

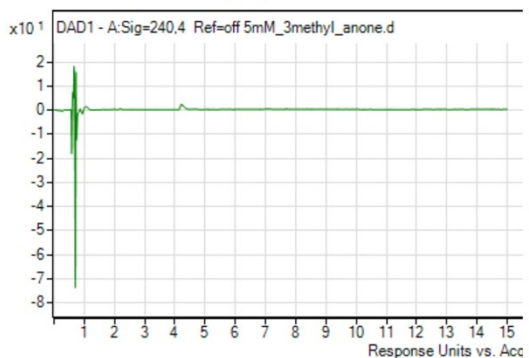

3-methyl-2-cyclohexenone

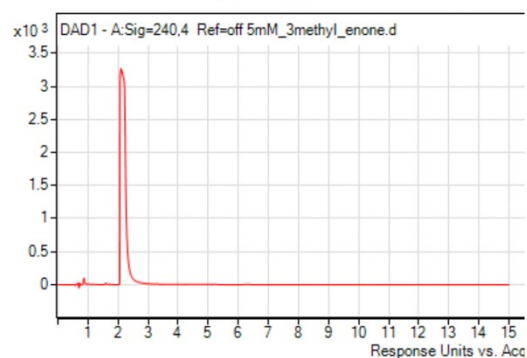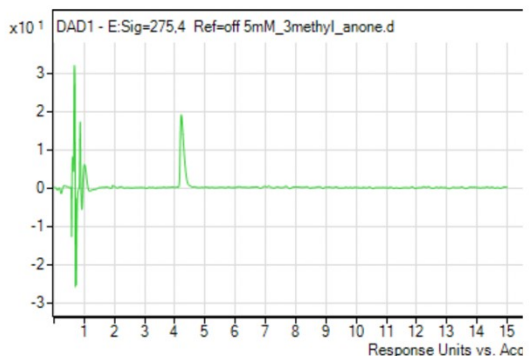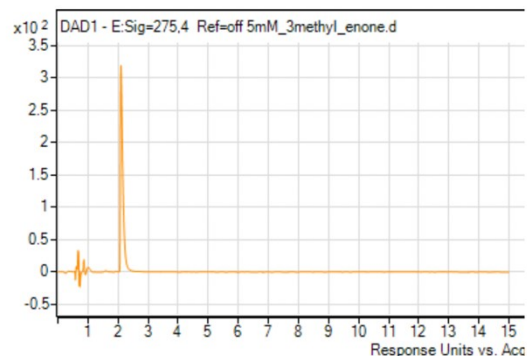

B

4,4-dimethylcyclohexanone

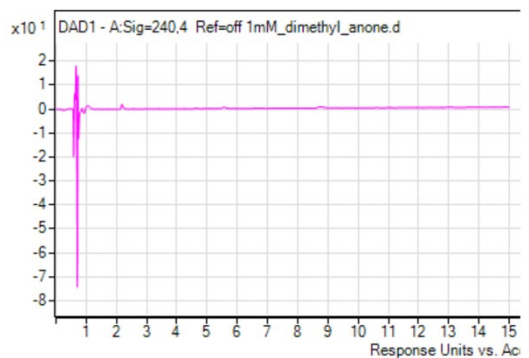

4,4-dimethyl-2-cyclohexen-1-one

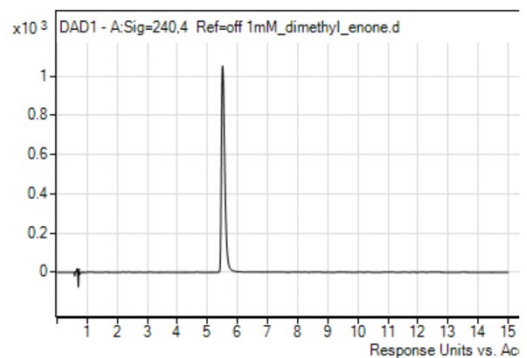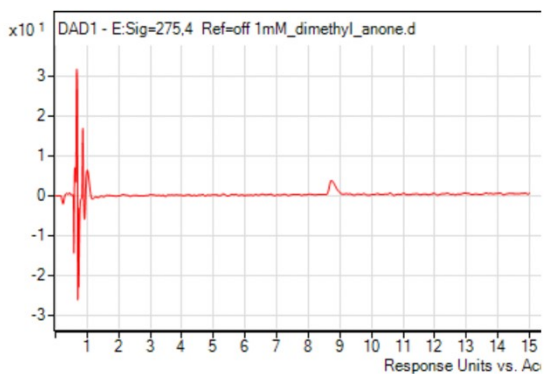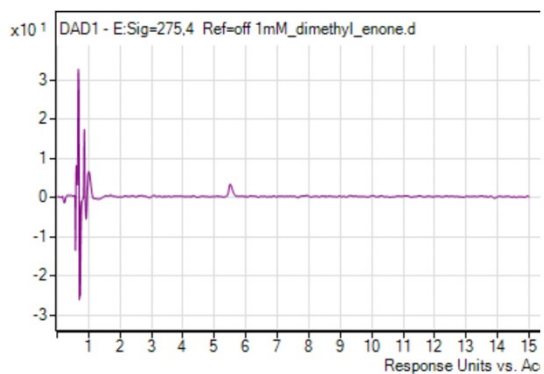

**Figure S2.** HPLC chromatograms from 5 mM standards of substrates (left) and corresponding products (right). Chromatograms were recorded at 240 nm (top) and 275 nm (bottom) for each standard. Chromatograms were acquired for 15-20 minutes. Substrates generally absorbed weakly at 275 nm and products absorbed much more strongly at 240 nm by virtue of their double bonds. 3-methylcyclohexanone had a retention time of ~4.2 min and 3-methyl-2-cyclohexenone had a retention time of ~2.0 min (**A**). 4,4-dimethylcyclohexanone had a retention time of ~8.8 min and 4,4-dimethyl-2-cyclohexen-1-one had a retention time of ~5.6 min (**B**).
