# Supplementary material for: Rational design of a cyclohexanone dehydrogenase for enhanced α,β-desaturation and substrate specificity
Source: Royal Society of Chemistry journal article supplement (doi:10.1039/d3sc04009g), 2024-01-01
Supplement: d3sc04009g8.pdf [file d3sc04009g8.pdf]

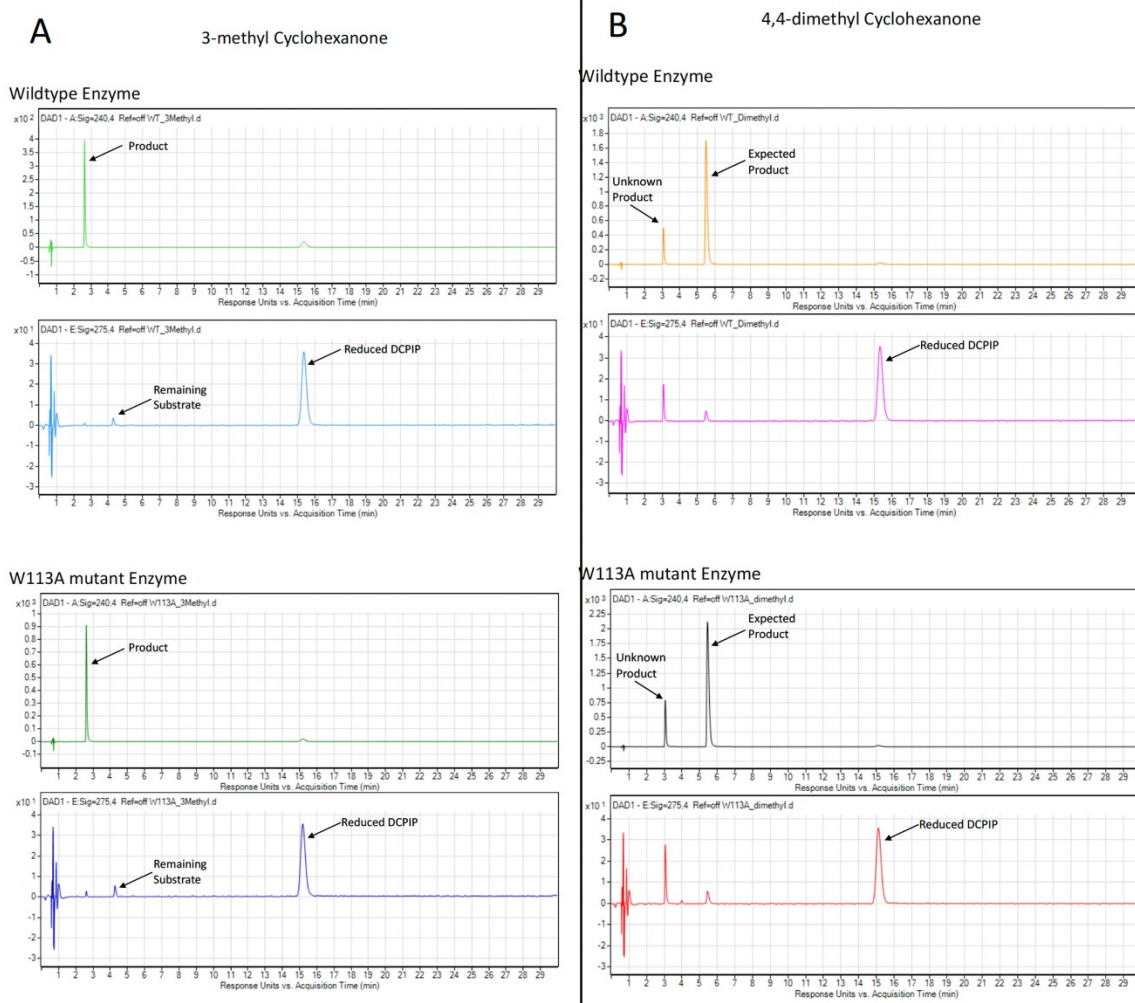

**Figure S4.** Example HPLC chromatograms showing products of 3-methylcyclohexanone (A), 4,4-Dimethylcyclohexanone (B) with either WT CDH or the W113A variant. Chromatograms were recorded at 240 nm and 275 nm. All retention times were compared with the retention times of the standards (Figure S2).
