# Supplementary material for: Rational design of a cyclohexanone dehydrogenase for enhanced α,β-desaturation and substrate specificity
Source: Royal Society of Chemistry journal article supplement (doi:10.1039/d3sc04009g), 2024-01-01
Supplement: d3sc04009g10.pdf [file d3sc04009g10.pdf]

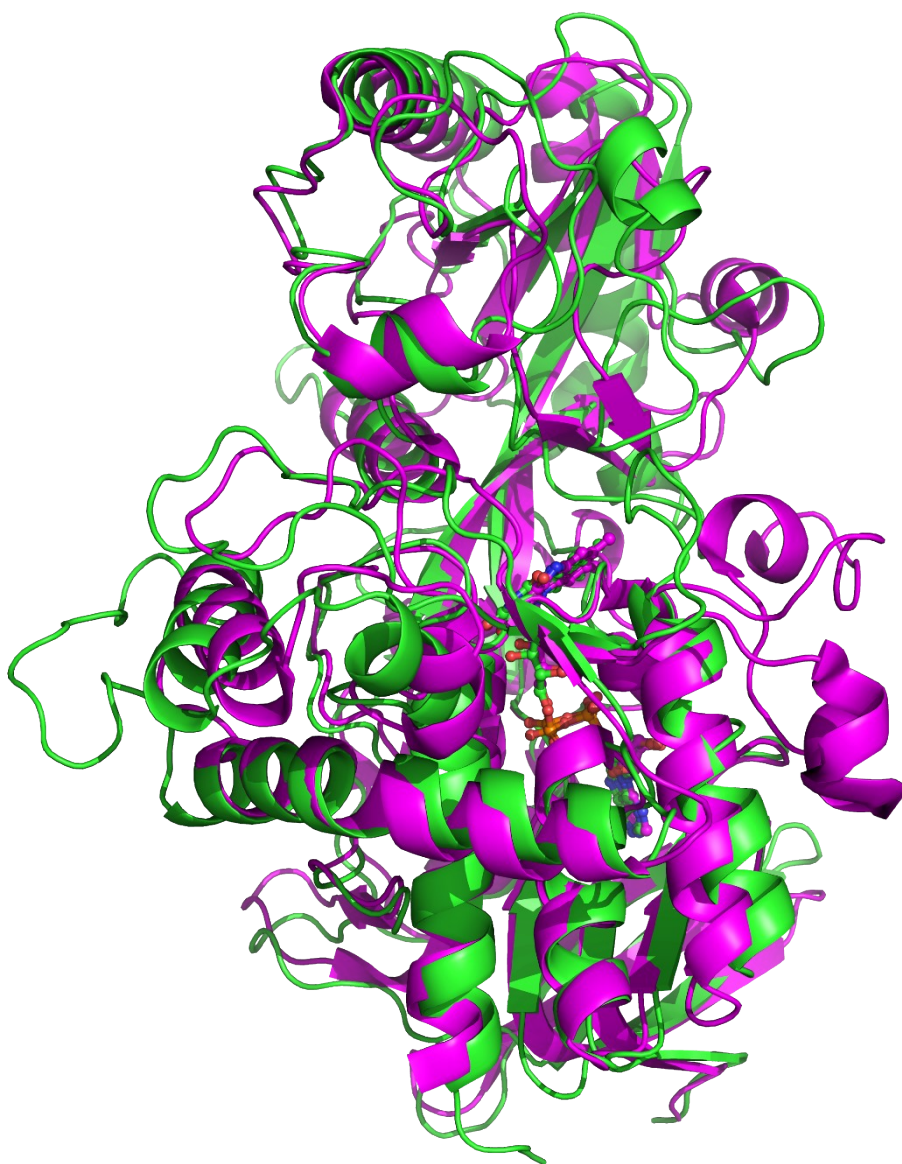

**Figure S6.** Superimposition of 3-Ketosteroid  $\Delta$ 1-Dehydrogenase from *Rhodococcus erythropolis* SQ1, PDB 4c3x(1) with wildtype CDH using COOT(2). rmsd achieved: 1.8823Å. The overlaid structures were drawn using PyMol.

1. A. Rohman, N. van Oosterwijk, A.-M. W. H. Thunnissen, B. W. Dijkstra, Crystal Structure and Site-directed Mutagenesis of 3-Ketosteroid  $\Delta$ 1-Dehydrogenase from *Rhodococcus erythropolis* SQ1 Explain Its Catalytic Mechanism\*. *Journal of Biological Chemistry* **288**, 35559-35568 (2013).
2. P. Emsley, K. Cowtan, Coot: model-building tools for molecular graphics. *Acta Crystallogr D Biol Crystallogr* **60**, 2126-2132 (2004).
