# Supplementary material for: Rational design of a cyclohexanone dehydrogenase for enhanced α,β-desaturation and substrate specificity
Source: Royal Society of Chemistry journal article supplement (doi:10.1039/d3sc04009g), 2024-01-01
Supplement: d3sc04009g11.pdf [file d3sc04009g11.pdf]

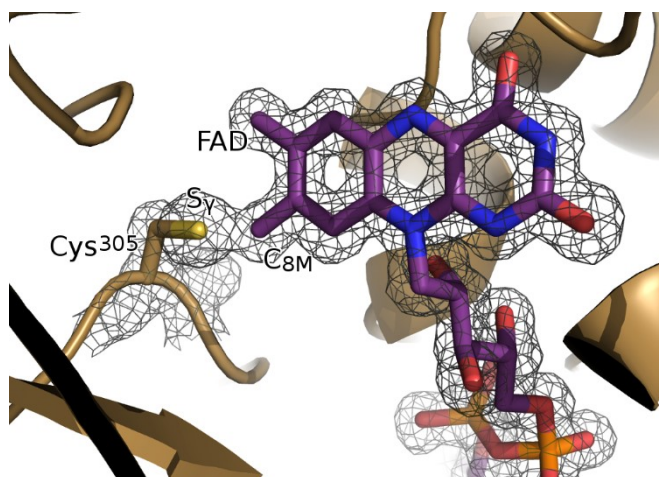

**Figure S7. FAD (purple sticks) and CDH (gold cartoon) form an unusually short intermolecular contact.** The  $S_{\gamma}$  atom of  $Cys^{305}$  (gold sticks) is situated only 1.84 Å from the  $C_{8M}$  atom of FAD. Electron density at  $2.0 \sigma$  (black mesh) bridges this gap, indicating a degree of shared electrons. The complexed form is shown; the intermolecular distance was identical in the non-complexed form.
